# Supplementary material
Source: PubMed Central journal article supplement (PMC4014305)
Supplement: NIHMS567817-supplement-supplement_1.pdf [file NIHMS567817-supplement-supplement_1.pdf]

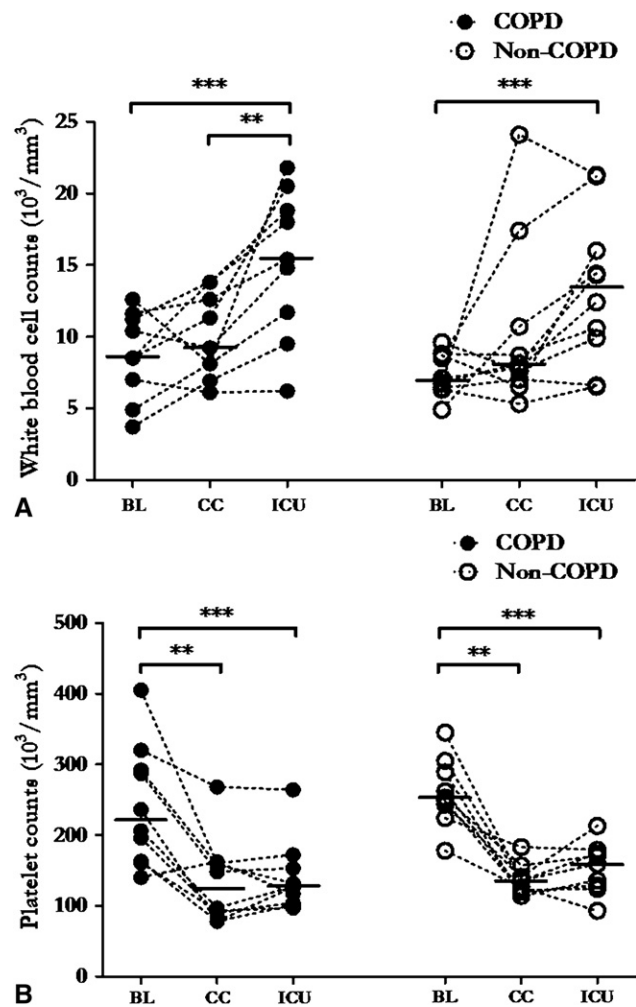

**FIGURE E1.** White blood cell (A) and platelet (B) counts in patients with chronic obstructive pulmonary disease (COPD, filled circles, n = 9) and without chronic obstructive pulmonary disease (non-COPD, open circles, n = 10) at baseline before sternotomy (BL), after chest closure (CC), and 2 hours after intensive care unit admission (ICU). Horizontal bars represent median values. Double asterisk indicates P < .01; triple asterisk indicates P < .001.

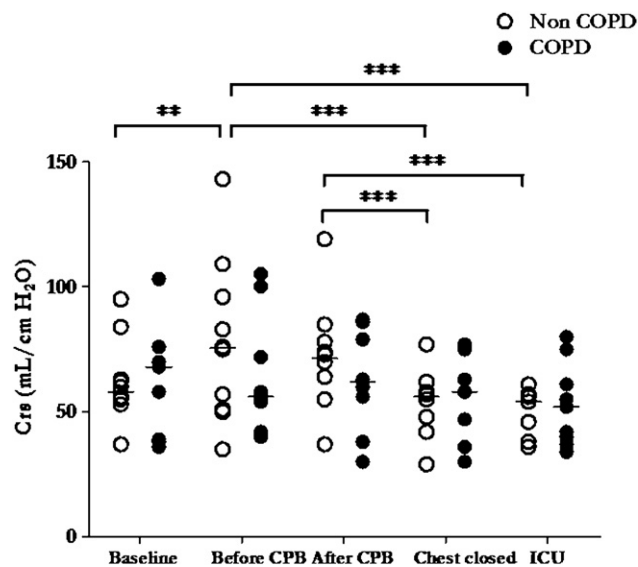

**FIGURE E2.** Compliance of the respiratory system (Crs) in patients with chronic obstructive pulmonary disease (COPD, filled circles, n = 9) and without chronic obstructive pulmonary disease (non-COPD, open circles, n = 10) at 5 major interventional phases: before sternotomy (Baseline), before and after cardiopulmonary bypass (CPB), after chest closure (chest closed), and 2 hours after intensive care unit admission (ICU). Horizontal bars represent median values. Double asterisk indicates P < .01; triple asterisk indicates P < .001. P values are derived from 2-way analysis of variance with repeated measurements, with Bonferroni adjustments for multiple comparisons.

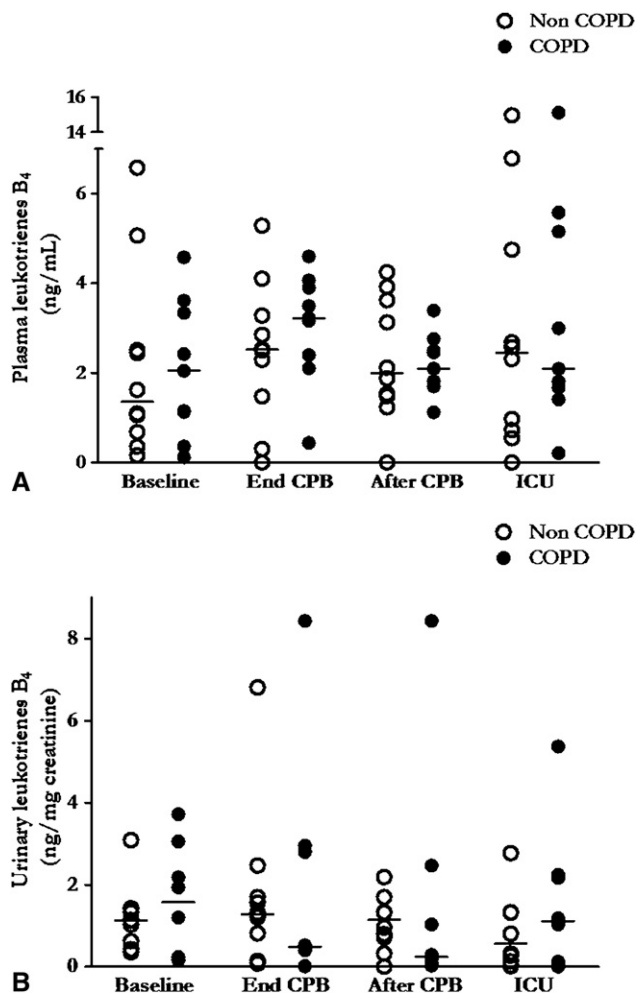

**FIGURE E3.** Plasma (A) and urinary (B) leukotriene B<sub>4</sub> concentrations of patients with chronic obstructive pulmonary disease (COPD, filled circles, n = 9 for plasma and n = 8 for urine samples) and without chronic obstructive pulmonary disease (non-COPD, open circles, n = 10) at 4 major interventional phases: before sternotomy (Baseline), at the end of cardiopulmonary bypass with continued extracorporeal circulation (End CPB), after cardiopulmonary bypass but before chest closure (After CPB), and 2 hours after intensive care unit admission (ICU). Horizontal bars represent median values.

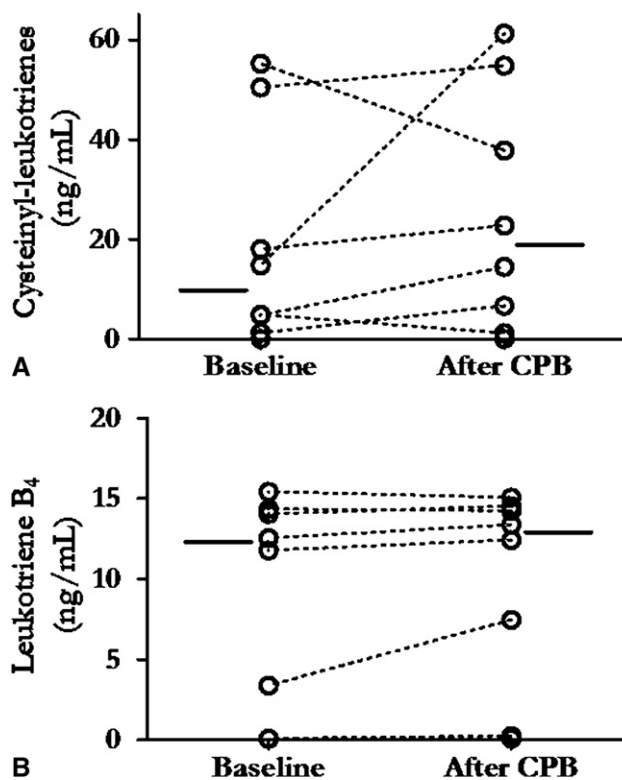

**FIGURE E4.** Cysteinyl leukotrienes (A) and leukotriene B<sub>4</sub> (B) tracheal aspirate concentrations in 8 patients with COPD before sternotomy (Baseline) and after cardiopulmonary bypass (CPB). Horizontal bars represent median values.

TABLE E1. Patient characteristics

| Case | Sex | Age (y) | COPD | GOLD | Smoking (pack-y) | BMI (kg/cm <sup>2</sup> ) | Aspirin | Inhaled steroids | Preoperative chest radiograph | Type of surgery |
|------|-----|---------|------|------|------------------|---------------------------|---------|------------------|-------------------------------|-----------------|
| 1    | M   | 81      | No   | NA   | 0                | 27.1                      | Yes     | No               | Normal                        | AVR, CABG ×1    |
| 2    | M   | 63      | No   | NA   | 0                | 30.5                      | Yes     | No               | Normal                        | CABG ×2         |
| 3    | F   | 71      | No   | NA   | 0                | 28.1                      | No      | No               | Normal                        | AVR             |
| 4    | M   | 50      | No   | NA   | 0                | 19.8                      | No      | No               | Normal                        | ARR             |
| 5    | M   | 73      | No   | NA   | 0                | 26.5                      | Yes     | No               | Normal                        | CABG ×3         |
| 6    | M   | 76      | No   | NA   | 0                | 23.0                      | Yes     | No               | Normal                        | CABG ×3         |
| 7*   | M   | 53      | No   | NA   | 0                | 22.6                      | No      | No               | Normal                        | MVR             |
| 8    | M   | 61      | No   | NA   | 0                | 23.6                      | Yes     | No               | Normal                        | CABG ×3         |
| 9    | F   | 53      | No   | NA   | 0                | 24.5                      | Yes     | No               | Normal                        | CABG ×3         |
| 10   | F   | 57      | No   | NA   | 0                | 22.0                      | Yes     | No               | Normal                        | LVMR            |
| 11   | F   | 66      | Yes  | IIa  | 150              | 34.1                      | Yes     | No               | Normal                        | CABG ×2         |
| 12   | M   | 82      | Yes  | IIb  | 65               | 21.8                      | No      | Yes              | P/E                           | AVR             |
| 13   | M   | 76      | Yes  | IIa  | 60               | 25.8                      | Yes     | No               | Distention                    | CABG ×2         |
| 14   | M   | 61      | Yes  | IIa  | 90               | 18.5                      | No      | No               | Normal                        | CABG ×3         |
| 15   | M   | 57      | Yes  | IIa  | 80               | 26.9                      | Yes     | No               | Normal                        | CABG ×5         |
| 16   | F   | 75      | Yes  | IIa  | 100              | 43.3                      | Yes     | Yes              | Normal                        | CABG ×2         |
| 17   | M   | 63      | Yes  | IIa  | 120              | 37.3                      | No      | No               | P/E, CPE                      | CABG ×4         |
| 18   | F   | 80      | Yes  | IIa  | 50               | 30.3                      | Yes     | Yes              | P/E, CPE                      | AVR, CABG ×3    |
| 19   | M   | 65      | Yes  | IIa  | 150              | 18.0                      | Yes     | Yes              | Distention                    | MVR             |

*COPD*, Chronic obstructive pulmonary disease; *GOLD*, Global Initiative for Chronic Obstructive Lung Disease classification<sup>19</sup>; *BMI*, body mass index; *M*, male; *NA*, not applicable; *AVR*, aortic valve repair; *CABG*, coronary artery bypass grafting; *F*, female; *ARR*, aortic root replacement; *MVR*, mitral valve repair; *LV*, left ventricular mass resection; *P/E*, pleural effusion; *CPE*, cardiogenic pulmonary edema. \*Venous access for cardiopulmonary bypass was performed with direct cannulation of both superior and inferior venae cavae.

TABLE E2. Hospital course of patients with and without chronic obstructive pulmonary disease

|                                                                              | COPD (n = 9) | No COPD (n = 10) | P value |
|------------------------------------------------------------------------------|--------------|------------------|---------|
| Duration of mechanical ventilation (h, mean ± SD)                            | 13.7 ± 5.8   | 6.8 ± 3.4        | <.01    |
| Duration of intensive care unit stay<br>(d, median and interquartile range)* | 2 (1–3)      | 1 (1–3)          | .27     |
| Postoperative atrial fibrillation (no.)                                      | 7 (78%)      | 3 (30%)          | .24     |
| Postoperative pneumonia (no.)                                                | 1 (11%)      | 0 (0%)           | >.999   |
| In-hospital mortality (no.)                                                  | 1 (11%)      | 0 (0%)           | >.999   |

*COPD*, Chronic obstructive pulmonary disease. \*P value according to Mann–Whitney test.
